# Supplementary material for: Aerobic epoxidation of β-ionone in water under mild conditions using aldehydes as catalyst precursors
Source: Royal Society of Chemistry journal article supplement (doi:10.1039/d3re00099k), 2023-01-01
Supplement: d3re00099k1.pdf [file d3re00099k1.pdf]

ESI for

**Aerobic epoxidation of  $\beta$ -ionone in water under mild conditions  
using aldehyde as the catalyst precursor**

Xu Zhang,<sup>\*a</sup> Zijie Wei<sup>a</sup> and Lei Yu<sup>\*a</sup>

<sup>a</sup> School of Chemistry and Chemical Engineering, Yangzhou University, Yangzhou,  
225002, China.

\* E-mail: [zhangxu@yzu.edu.cn](mailto:zhangxu@yzu.edu.cn) (X. Zhang); [yulei@yzu.edu.cn](mailto:yulei@yzu.edu.cn) (L. Yu); Tel: +86-136-  
6529-5901; Fax: +86-514-87975244

**CONTENTS**

**NMR spectra of the products.....S2**

## NMR spectra of the products

5,6-Epoxy- $\beta$ -ionone **2**,  $^1\text{H}$  NMR,  $\text{CDCl}_3$ , 400 MHz

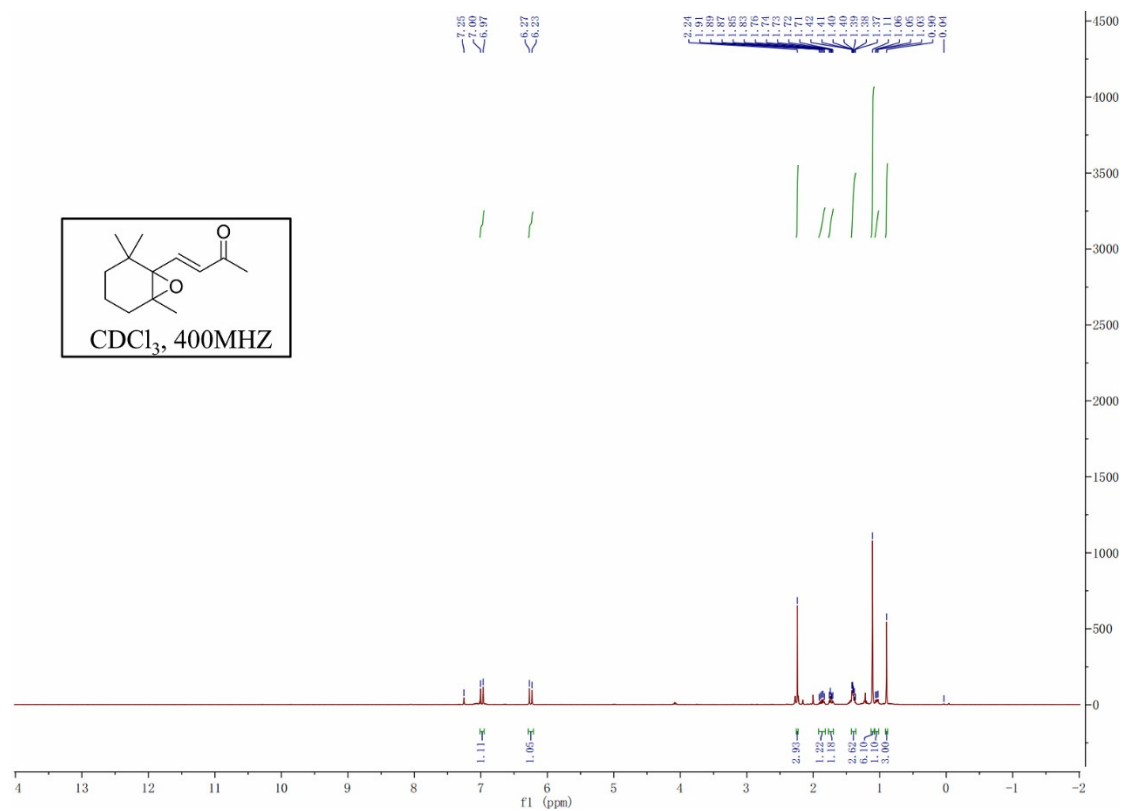

**Figure S1.**  $^1\text{H}$  NMR spectrum of 5,6-epoxy- $\beta$ -ionone **2**.

5,6-Epoxy- $\beta$ -ionone **2**,  $^{13}\text{C}$  NMR,  $\text{CDCl}_3$ , 100 MHz

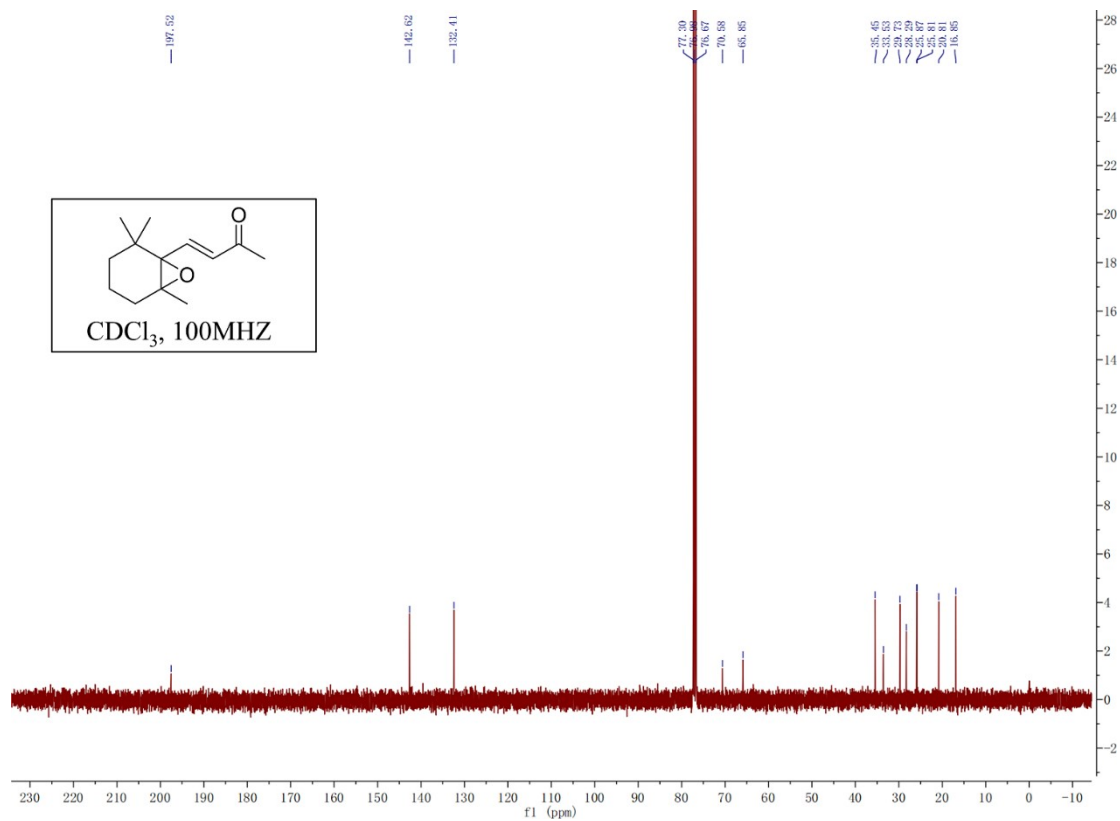

**Figure S2.**  $^{13}\text{C}$  NMR spectra of 5,6-epoxy- $\beta$ -ionone **2**.

1-(Naphthalen-2-yl)ethan-1-one **11**,  $^1\text{H}$  NMR,  $\text{CDCl}_3$ , 400 MHz

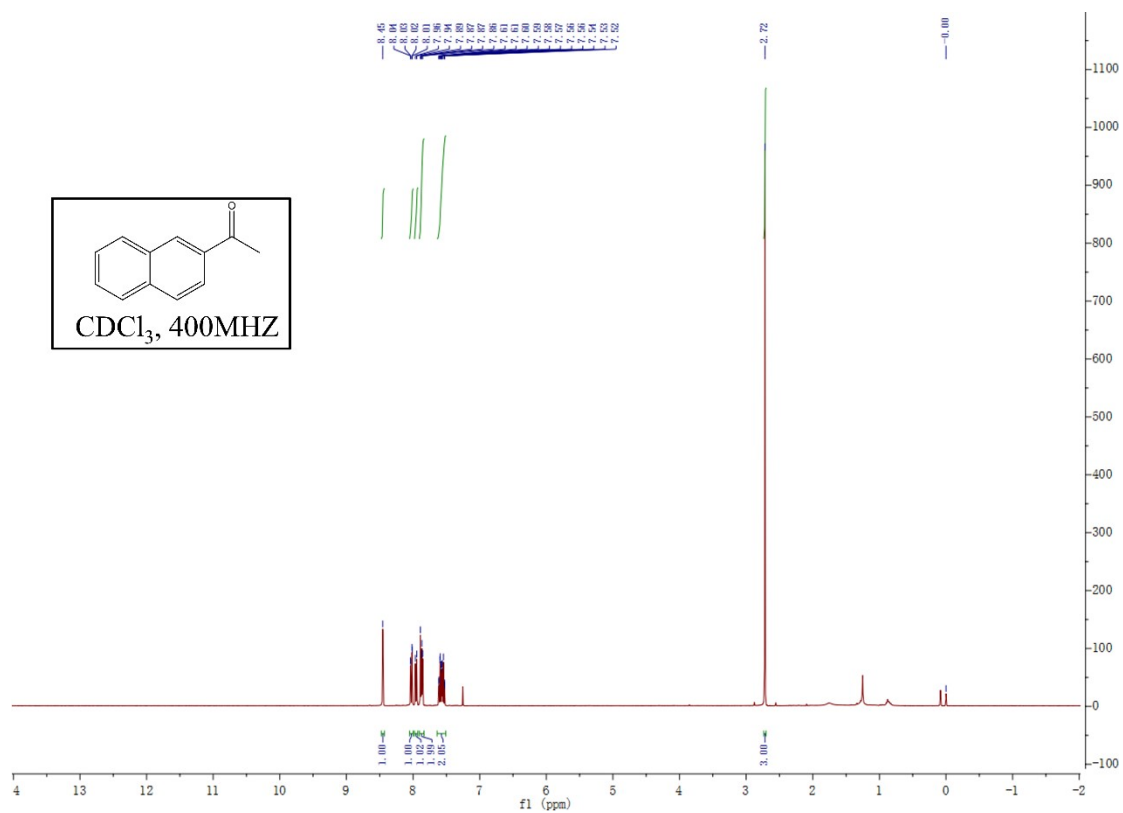

**Figure S3.**  $^1\text{H}$  NMR spectra of 1-(naphthalen-2-yl)ethan-1-one **11**.
